# Supplementary material
Source: publisher figshare collection journal article supplement (https://acs.figshare.com/ndownloader/files/5087392)
Supplement: Supplementary file 1 [file 5087392]

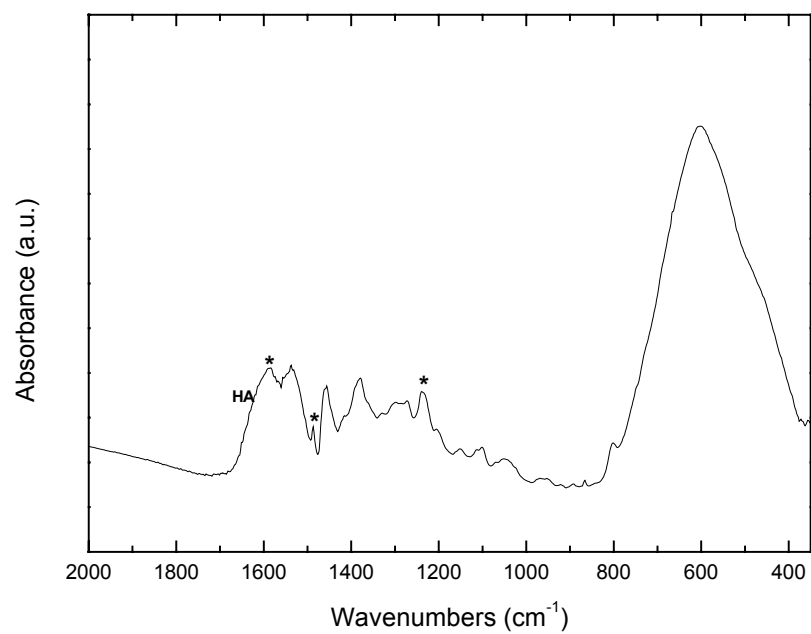

**Figure S1:** FTIR curve measured on dried SnO<sub>2</sub> colloids prepared with hexylamine (HA). The asterisks indicate the peaks of residual DPE.

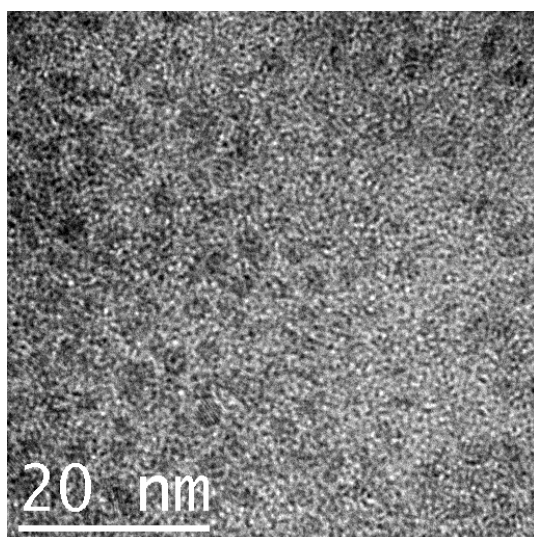

**Figure S2:** Bright field TEM general view of SnO<sub>2</sub> nanocrystals.

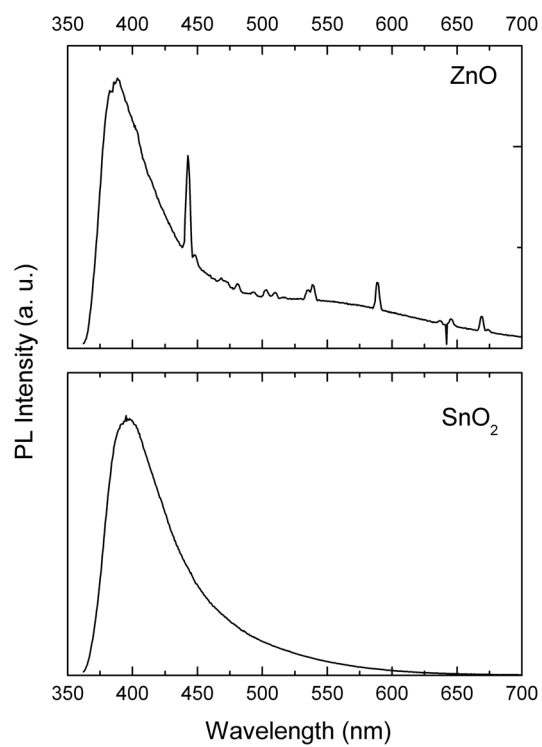

**Figure S3:** PL spectra measured on diluted ZnO and SnO<sub>2</sub> suspensions.
